# Supplementary material for: The Novel Inhibitory Effect of YM976 on Adipocyte Differentiation
Source: MDPI journal article supplement (doi:10.3390/cells12020205), 2023-01-04
Supplement: s1 [file s1]

## **Supplementary Figure**

# **The novel inhibitory effect of YM976 on adipocyte differentiation**

**Hee Jung Kim <sup>1,2</sup>, Dong-Hoon Kim <sup>3\*</sup> and Sung Hee Um <sup>1, 2, 4\*</sup>**

<sup>1</sup> Department of Molecular Cell Biology, Samsung Biomedical Research Institute, Sungkyunkwan University School of Medicine, Suwon 16419, Republic of Korea

<sup>2</sup> Department of Health Sciences and Technology, Samsung Advanced Institute for Health Sciences and Technology, Samsung Medical Center, Sungkyunkwan University, Seoul 06351, Republic of Korea

<sup>3</sup> Department of Pharmacology, Korea University College of Medicine, Seoul 02841, Republic of Korea

<sup>4</sup> Biomedical Institute Convergence at Sungkyunkwan University, Suwon 16419, Republic of Korea

\* Correspondence: LDHKIM@korea.ac.kr (D.H.K.); shum@skku.edu (S.H.U.)

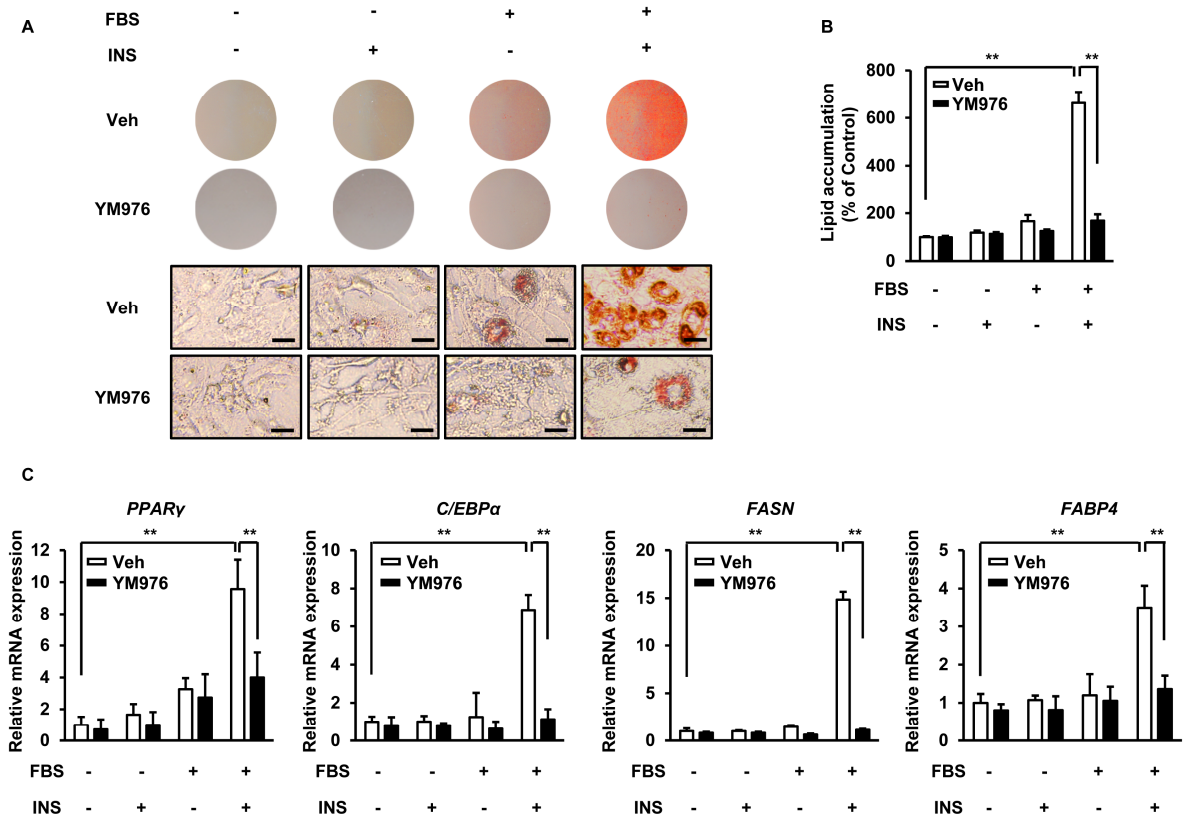

**Figure S1.** YM976 suppresses adipocyte differentiation. 3T3-L1 cells were exposed to differentiation media in the presence or absence of FBS or insulin and treated with Veh or 10  $\mu$ M YM976 every other day from initiation to six days of differentiation. (A) Microscopic images of Oil Red O Staining. (B) Quantification of Oil Red O staining by spectrophotometry. (C) The mRNA expression of PPAR $\gamma$ , C/EBP $\alpha$ , FASN, and FABP4 in cells treated with Veh or YM976 was analyzed by qRT-PCR. In B-C, n = 3 per group. Images are representative of three independent experiments. Scale bar = 100  $\mu$ m. Values indicate mean  $\pm$  SD. \*\* $p$  < 0.01. Data were assessed by one-way ANOVA.
